# Supplementary material for: Patterns of brain metastasis immediately before prophylactic cranial irradiation (PCI): implications for PCI optimization in limited-stage small cell lung cancer
Source: PubMed Central journal article supplement (PMC6749639; doi:10.1186/s13014-019-1371-4), 2019-09-18
Supplement: 13014_2019_1371_MOESM1_ESM.pdf [file 13014_2019_1371_MOESM1_ESM.pdf]

## Supplemental Figure 1.

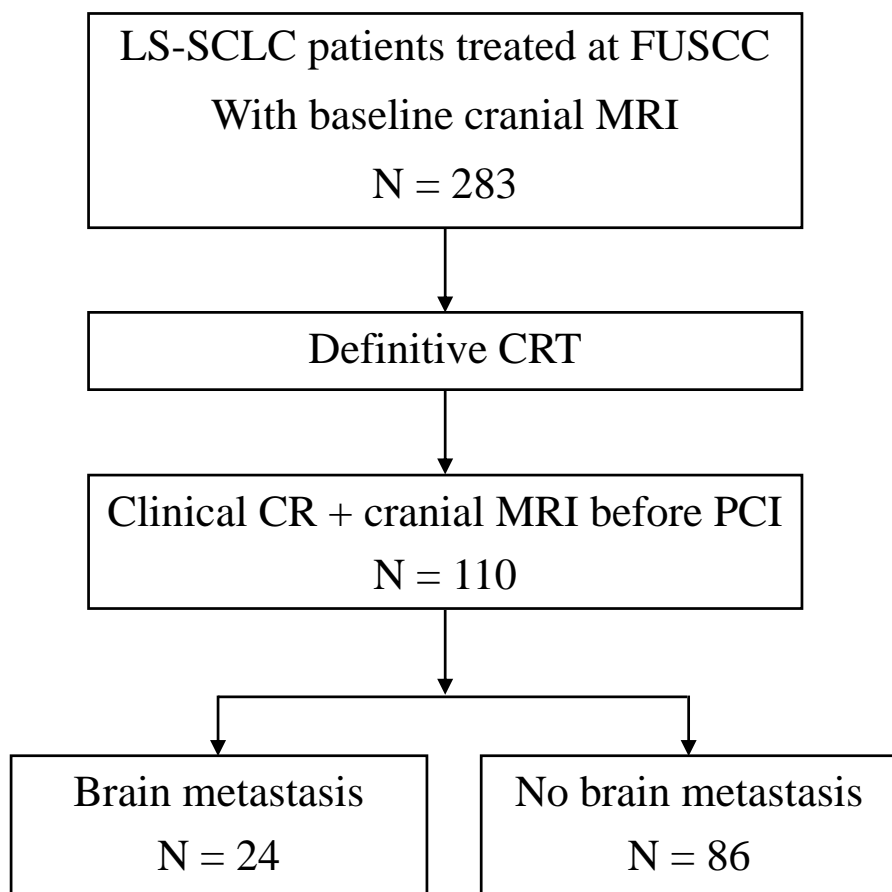

**Supplemental Figure 1. Patient selection workflow.** Selection of LS-SCLC patients treated at Fudan University Shanghai Cancer Center (FUSCC) according to the response to definitive chemoradiotherapy (CRT) and the findings of the contrast-enhanced cranial MRI performed immediately before PCI.
